# Supplementary material for: Enzymatically Driven Mineralization of a Calcium–Polyphosphate Bleaching Gel
Source: MDPI journal article supplement (doi:10.3390/bioengineering11010083), 2024-01-16
Supplement: s1 [file s1]

## Enzymatically-driven mineralization of a calcium-polyphosphate bleaching gel

### Supplementary

**Table S1.** Secondary structure of the alkaline phosphatase (ALP) dispersed in the different solutions

| <b>Solution</b> | <b><math>\alpha</math>-Helix (%)</b> | <b><math>\beta</math>-sheets (%)</b> | <b>Turn and coil (%)</b> | <b>NRMSD</b> |
|-----------------|--------------------------------------|--------------------------------------|--------------------------|--------------|
| Water           | 11.5                                 | 52.7                                 | 35.4                     | 0.06         |
| Tris buffer     | 7.5                                  | 28.1                                 | 64.4                     | 0.04         |
| Sol B           | 9.1                                  | 26.1                                 | 64.8                     | 0.05         |
| HP-35%-T        | 3.7                                  | 27.3                                 | 69.1                     | 0.11         |
| HP-35%-H        | 2.9                                  | 28.8                                 | 67.4                     | 0.08         |

Water (MilliQ water); Sol B (Tris-based); HP-35%-T (tris-based); HP-35%-H (water-based); NRMSD: normalized root mean square error deviation

**Table S2.** Color variation ( $\Delta E$ ;  $\Delta E_{00}$ ;  $\Delta WID$ ) according to the treatment group and assessment period

|                                    | Control                       | Commercial                       | Exp-H                           | CaPP-H                          | ALP-H                           | Exp-T                            | CaPP-T                           | ALP-T                            | p-value |
|------------------------------------|-------------------------------|----------------------------------|---------------------------------|---------------------------------|---------------------------------|----------------------------------|----------------------------------|----------------------------------|---------|
| Median (minimum and maximum value) |                               |                                  |                                 |                                 |                                 |                                  |                                  |                                  |         |
| $\Delta E_1$                       | 3.62 <b>B</b><br>(2.69; 4.70) | 11.44 <b>A</b><br>(9.64; 15.11)  | 12.45 <b>A</b><br>(7.30; 20.33) | 11.69 <b>A</b><br>(8.94; 21.38) | 11.30 <b>A</b><br>(8.24; 18.71) | 12.51 <b>A</b><br>(10.34; 15.18) | 13.11 <b>A</b><br>(8.66; 23.20)  | 12.25 <b>A</b><br>(9.96; 14.16)  | <0.0001 |
| $\Delta E_2$                       | 3.59 <b>B</b><br>(2.34; 4.18) | 14.05 <b>A</b><br>(11.16; 17.67) | 14.36 <b>A</b><br>(7.66; 24.82) | 13.19 <b>A</b><br>(9.79; 31.17) | 14.31 <b>A</b><br>(9.14; 26.15) | 14.64 <b>A</b><br>(12.21; 19.16) | 16.20 <b>A</b><br>(10.20; 26.95) | 14.65 <b>A</b><br>(11.55; 19.78) | <0.0001 |
| $\Delta E_3$                       | 2.46 <b>B</b><br>(2.18; 3.09) | 11.61 <b>A</b><br>(9.38; 15.68)  | 12.28 <b>A</b><br>(5.64; 23.33) | 11.18 <b>A</b><br>(5.57; 30.39) | 11.70 <b>A</b><br>(7.15; 27.20) | 11.92 <b>A</b><br>(9.53; 15.16)  | 14.15 <b>A</b><br>(7.60; 25.38)  | 12.44 <b>A</b><br>(9.62; 17.57)  | <0.0001 |
| $\Delta E_4$                       | 4.10 <b>B</b><br>(2.92; 5.61) | 8.03 <b>A</b><br>(6.02; 12.53)   | 9.04 <b>A</b><br>(2.99; 19.52)  | 8.00 <b>A</b><br>(3.30; 26.35)  | 8.94 <b>A</b><br>(4.95; 24.29)  | 9.68 <b>A</b><br>(6.71; 11.93)   | 10.91 <b>A</b><br>(4.77; 21.86)  | 9.03 <b>A</b><br>(6.42; 14.44)   | <0.0001 |
| $\Delta E_5$                       | 4.00 <b>B</b><br>(3.41; 5.30) | 8.93 <b>A</b><br>(6.61; 12.52)   | 9.80 <b>A</b><br>(3.53; 19.84)  | 8.43 <b>A</b><br>(3.66; 26.35)  | 9.22 <b>A</b><br>(5.17; 23.48)  | 10.20 <b>A</b><br>(7.00; 12.49)  | 11.64 <b>A</b><br>(5.21; 22.23)  | 9.25 <b>A</b><br>(6.63; 14.89)   | <0.0001 |
| $\Delta E_{001}$                   | 2.43 <b>B</b><br>(1.82; 3.50) | 8.08 <b>A</b><br>(6.91; 9.98)    | 8.35 <b>A</b><br>(5.62; 13.45)  | 8.14 <b>A</b><br>(6.87; 14.70)  | 7.90 <b>A</b><br>(5.63; 13.02)  | 8.65 <b>A</b><br>(7.37; 10.57)   | 9.28 <b>A</b><br>(6.50; 15.92)   | 8.39 <b>A</b><br>(7.20; 10.13)   | <0.0001 |
| $\Delta E_{002}$                   | 2.77 <b>B</b><br>(2.00; 3.19) | 9.30 <b>A</b><br>(7.27; 11.40)   | 9.89 <b>A</b><br>(5.34; 16.06)  | 9.02 <b>A</b><br>(6.80; 20.25)  | 9.28 <b>A</b><br>(6.08; 17.12)  | 9.88 <b>A</b><br>(8.67; 12.67)   | 11.02 <b>A</b><br>(7.38; 17.88)  | 9.55 <b>A</b><br>(8.03; 13.61)   | <0.0001 |
| $\Delta E_{003}$                   | 3.25 <b>B</b><br>(2.56; 3.56) | 7.99 <b>A</b><br>(6.81; 10.58)   | 8.99 <b>A</b><br>(4.04; 14.61)  | 7.90 <b>A</b><br>(4.68; 19.78)  | 7.83 <b>A</b><br>(5.03; 17.34)  | 8.46 <b>A</b><br>(6.99; 10.38)   | 10.11 <b>A</b><br>(5.83; 16.53)  | 8.45 <b>A</b><br>(6.56; 12.65)   | <0.0001 |
| $\Delta E_{004}$                   | 4.31 <b>B</b><br>(3.62; 5.04) | 6.03 <b>A</b><br>(4.95; 8.51)    | 6.97 <b>A</b><br>(2.84; 12.06)  | 5.82 <b>A</b><br>(3.92; 17.08)  | 6.25 <b>A</b><br>(4.07; 15.40)  | 7.06 <b>A</b><br>(5.31; 8.07)    | 7.76 <b>A</b><br>(4.31; 14.08)   | 6.47 <b>A</b><br>(5.09; 10.34)   | 0.0016  |
| $\Delta E_{005}$                   | 4.27 <b>B</b><br>(3.80; 5.00) | 6.43 <b>A</b><br>(5.37; 8.50)    | 7.46 <b>A</b><br>(3.11; 12.28)  | 6.04 <b>A</b><br>(4.22; 17.10)  | 6.49 <b>A</b><br>(4.27; 14.86)  | 7.49 <b>A</b><br>(5.58; 8.51)    | 8.31 <b>A</b><br>(4.50; 14.33)   | 6.68 <b>A</b><br>(5.31; 10.94)   | 0.0004  |

|               | Control                               | Commercial                          | Exp-H                               | CaPP-H                              | ALP-H                               | Exp-T                               | CaPP-T                             | ALP-T                               | p-value |
|---------------|---------------------------------------|-------------------------------------|-------------------------------------|-------------------------------------|-------------------------------------|-------------------------------------|------------------------------------|-------------------------------------|---------|
|               | Median (minimum and maximum value)    |                                     |                                     |                                     |                                     |                                     |                                    |                                     |         |
| $\Delta$ WID1 | 4.49 <b>B</b><br>(2.29; 5.94)         | 16.03 <b>A</b><br>(12.38;<br>20.03) | 15.55 <b>A</b><br>(10.94;<br>31.82) | 15.86 <b>A</b><br>(10.19;<br>34.37) | 15.10 <b>A</b><br>(10.24;<br>26.82) | 15.51 <b>A</b><br>(12.11;<br>20.94) | 17.52 <b>A</b><br>(9.71; 36.98)    | 15.73 <b>A</b><br>(11.99;<br>20.24) | 0.0003  |
| $\Delta$ WID2 | 0.56 <b>B</b><br>(-1.25; 1.32)        | 14.69 <b>A</b><br>(11.10;<br>19.61) | 15.07 <b>A</b><br>(8.47; 35.52)     | 14.22 <b>A</b><br>(7.80; 46.18)     | 15.57 <b>A</b><br>(7.94; 37.92)     | 16.13 <b>A</b><br>(10.63;<br>23.17) | 18.45 <b>A</b><br>(8.52; 39.41)    | 16.28 <b>A</b><br>(11.18;<br>23.89) | 0.0003  |
| $\Delta$ WID3 | -4.89 <b>B</b><br>(-7.78; -4.04)      | 11.08 <b>A</b><br>(7.43; 17.60)     | 11.12 <b>A</b><br>(3.55; 30.82)     | 9.79 <b>A</b><br>(1.10; 47.45)      | 10.80 <b>A</b><br>(3.81; 38.65)     | 11.17 <b>A</b><br>(5.70; 18.32)     | 13.33 <b>A</b><br>(4.96; 35.49)    | 10.96 <b>A</b><br>(4.77; 19.84)     | 0.0003  |
| $\Delta$ WID4 | -8.98 <b>B</b><br>(-12.24; -<br>7.61) | 5.43 <b>A</b><br>(1.84; 12.83)      | 6.30 <b>A</b><br>(-1.38;<br>25.13)  | 4.27 <b>A</b><br>(-3.35;<br>41.87)  | 6.34 <b>A</b><br>(-0.12;<br>34.02)  | 6.52 <b>A</b><br>(0.19; 13.45)      | 7.89 <b>A</b><br>(-0.13;<br>30.11) | 6.06 <b>A</b><br>(-0.60;<br>14.91)  | 0.0003  |
| $\Delta$ WID5 | -8.45 <b>B</b><br>(-11.30; -<br>7.19) | 6.58 <b>A</b><br>(2.77; 12.71)      | 7.58 <b>A</b><br>(-0.63;<br>25.57)  | 4.97 <b>A</b><br>(-2.72;<br>42.05)  | 6.84 <b>A</b><br>(0.35; 33.26)      | 7.30 <b>A</b><br>(0.72; 14.20)      | 8.79 <b>A</b><br>(1.62; 30.49)     | 6.20 <b>A</b><br>(0.23; 15.52)      | 0.0003  |

Times:  $\Delta$ E1;  $\Delta$ E<sub>00</sub>1;  $\Delta$ WID1: 1st session.  $\Delta$ E2;  $\Delta$ E<sub>00</sub>2;  $\Delta$ WID2: 2nd session.  $\Delta$ E3;  $\Delta$ E<sub>00</sub>3;  $\Delta$ WID3: 3rd session.  $\Delta$ E4;  $\Delta$ E<sub>00</sub>4;  $\Delta$ WID4: 7 days' after.  $\Delta$ E5;  $\Delta$ E<sub>00</sub>5;  $\Delta$ WID5: 14 days' after. Groups: Control (saliva only); Commercial (HP35%-Whitenes HP-Maxx); Exp-H (Water based); CaPP-H (0.5 wt% CaPP); ALP-H (0.5 wt% CaPP + ALP); Exp-T (Tris based); CaPP-T (0.5 wt% CaPP); ALP-T (0.5 wt% CaPP + ALP). *Different case letters indicate significant difference between the groups.*
